# Supplementary material
Source: PubMed Central journal article supplement (PMC6783339)
Supplement: NIHMS1525780-supplement-Supplemental_Digital_Content_to_Be_Published__cited_in_text_.pdf [file NIHMS1525780-supplement-Supplemental_Digital_Content_to_Be_Published__cited_in_text_.pdf]

A.

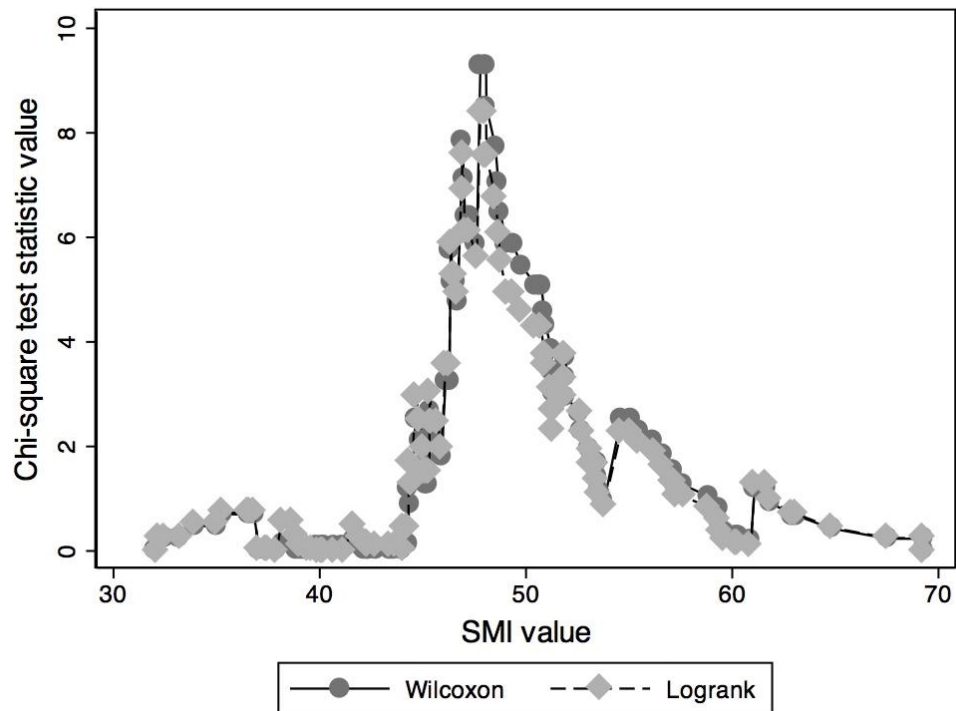

B.

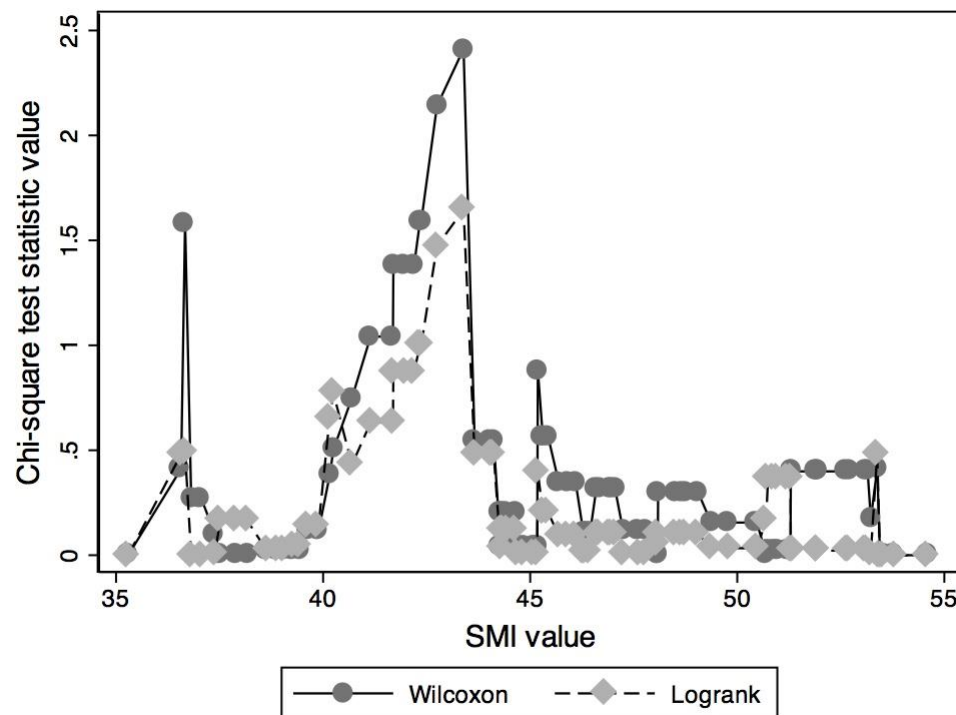

**Figure S1.** Log-rank and Wilcoxon test statistics measuring separation of survival curves at individual SMI cutoff values for men (A) and women (B). SMI, skeletal muscle index.
